# Supplementary material for: Polyphosphate drives bacterial heterochromatin formation
Source: PubMed Central journal article supplement (PMC10954037; doi:10.1126/sciadv.abk0233), 2021-12-22
Supplement: sciadv.abk0233_sm.pdf [file sciadv.abk0233_sm.pdf]

Supplementary Materials for  
**Polyphosphate drives bacterial heterochromatin formation**

Francois Beaufay, Haley M. Amemiya, Jian Guan, Joseph Basalla, Ben A. Meinen,  
Ziyuan Chen, Rishav Mitra, James C. A. Bardwell, Julie S. Biteen, Anthony G. Vecchiarelli,  
Peter L. Freddolino\*, Ursula Jakob\*

\*Corresponding author. Email: [ujakob@umich.edu](mailto:ujakob@umich.edu) (U.J.); [petefred@umich.edu](mailto:petefred@umich.edu) (P.L.F.)

Published 22 December 2021, *Sci. Adv.* **7**, eabk0233 (2021)  
DOI: 10.1126/sciadv.abk0233

**The PDF file includes:**

Figs. S1 to S4  
Table S1  
Legends for movies S1 to S7  
Legends for data S1 and S2  
References

**Other Supplementary Material for this manuscript includes the following:**

Movies S1 to S7  
Data S1 and S2

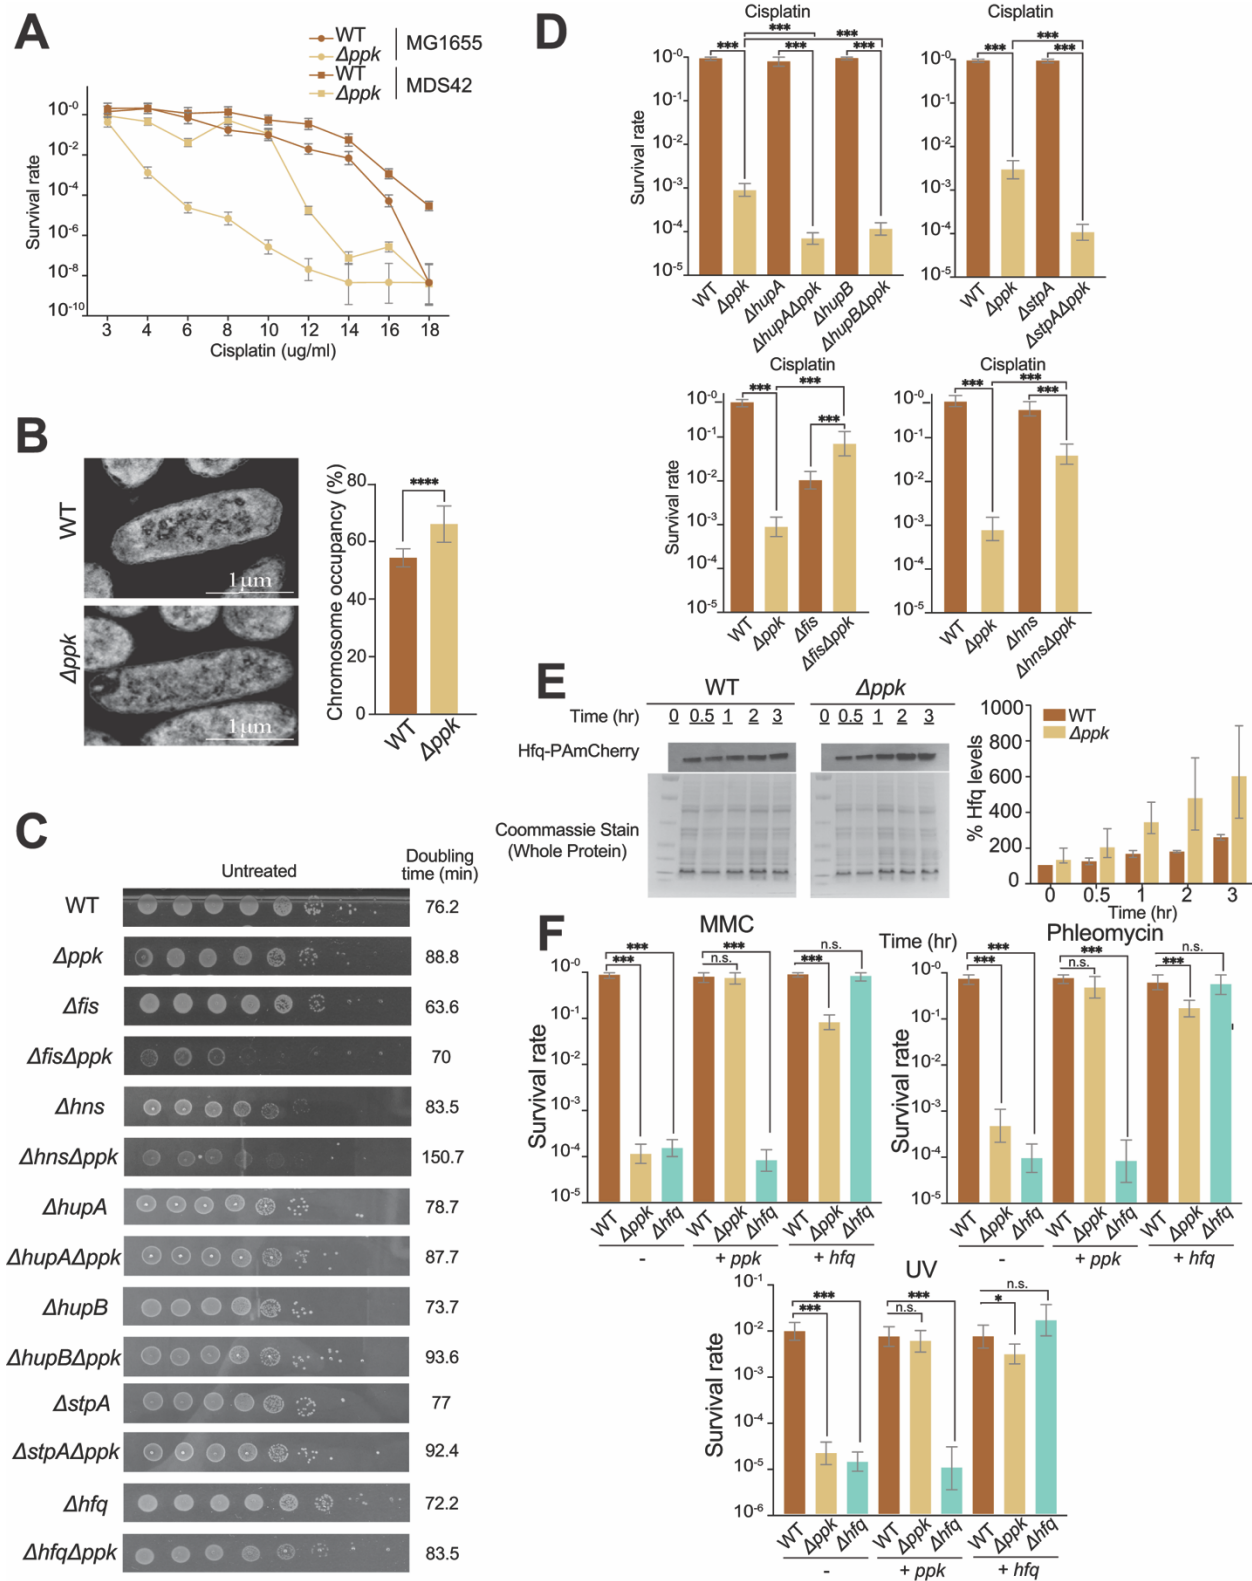

**Fig. S1. *Ppk* promotes cells survival upon DNA damaging stress conditions**  
 (A) Survival of MG1655 and MDS42 and their respective *ppk* deletion mutants upon exposure to increasing concentrations of cisplatin. (B) Left panel: thin section microscopy of MG1655 WT and  $\Delta ppk$  cells; right panel: associated space occupied by the nucleoid in each mutant under non-stress conditions.

(C) 10X serial dilution of various NAP deletion strains in otherwise MG1655 wild-type or  $\Delta ppk$  background, and their associated growth rates in MOPS-glucose media. (D) Survival of the indicated strains in an MG1655 background upon exposure to 4  $\mu\text{g/ml}$  cisplatin. \*\*\* indicates a greater than 99.5% posterior probability that the indicated survival rates differ (using a Bayesian analysis of the survival data; see Methods for details). (E) Abundance of Hfq-PA-mcherry in wild-type and  $\Delta ppk$  cells before and at defined times after addition of 10  $\mu\text{g/ml}$  cisplatin as determined by western blot analysis using antibodies against mCherry. The total protein loaded on the SDS-PAGE was used as loading control. The steady state level of Hfq at time point 0 in Hfq-PA-mcherry expressing strain MG1655 was set to 100%. (F) Survival of wild-type,  $\Delta ppk$  and  $\Delta hfq$  cells in MG1655 complemented with an empty plasmid or a plasmid carrying either a copy of *ppk* or *hfq* upon exposure to 4  $\mu\text{g/ml}$  cisplatin, 1  $\mu\text{g/ml}$  mitomycin C (MMC), 0.25  $\mu\text{g/ml}$  phleomycin or 25  $\text{J/m}^2$  UV. Survival rates were scored after 16-24 h growth at 37°C. Significance is indicated based on the fraction of the posterior density for the difference between a WT background and deletion mutants (bearing the same overexpression plasmid) that is in the observed direction: \*,  $P > 0.95$ ; \*\*,  $P > 0.99$ ; \*\*\*,  $P > 0.995$ ; \*\*\*\*,  $P > 0.9995$ .

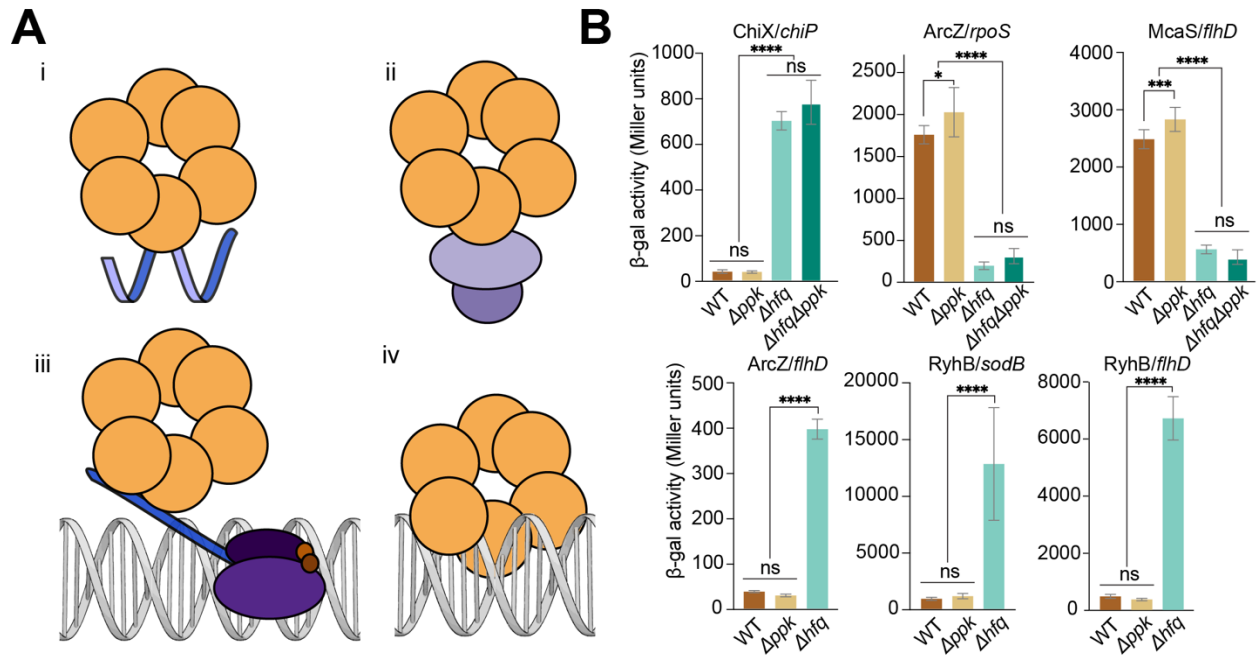

**Fig. S2. Known functions of Hfq and effect of polyP on *in vivo* RNA chaperone activity of Hfq.**

**(A)** Schematic of known mechanisms through which Hfq interacts with nucleic acids; (i) direct binding of RNA (multiple binding faces exist, which may lead to either small RNA-mediated or direct effects on the target); (ii) chaperone activity in ribosome biogenesis; (iii) indirect association with DNA through interactions with nascent transcripts; (iv) direct binding of DNA. Citations describing each role are given in the main text. **(B)** Activity of small RNAs on their specific targets in *Δppk* and *Δhfq* cells measured by  $\beta$ -galactosidase assays ( $n \geq 3$ ; \*,  $P > 0.05$ ; \*\*,  $P > 0.01$ ; \*\*\*,  $P > 0.001$ ; \*\*\*\*,  $P > 0.0001$ ; ns, nonsignificant, tukey's multiple comparisons test).

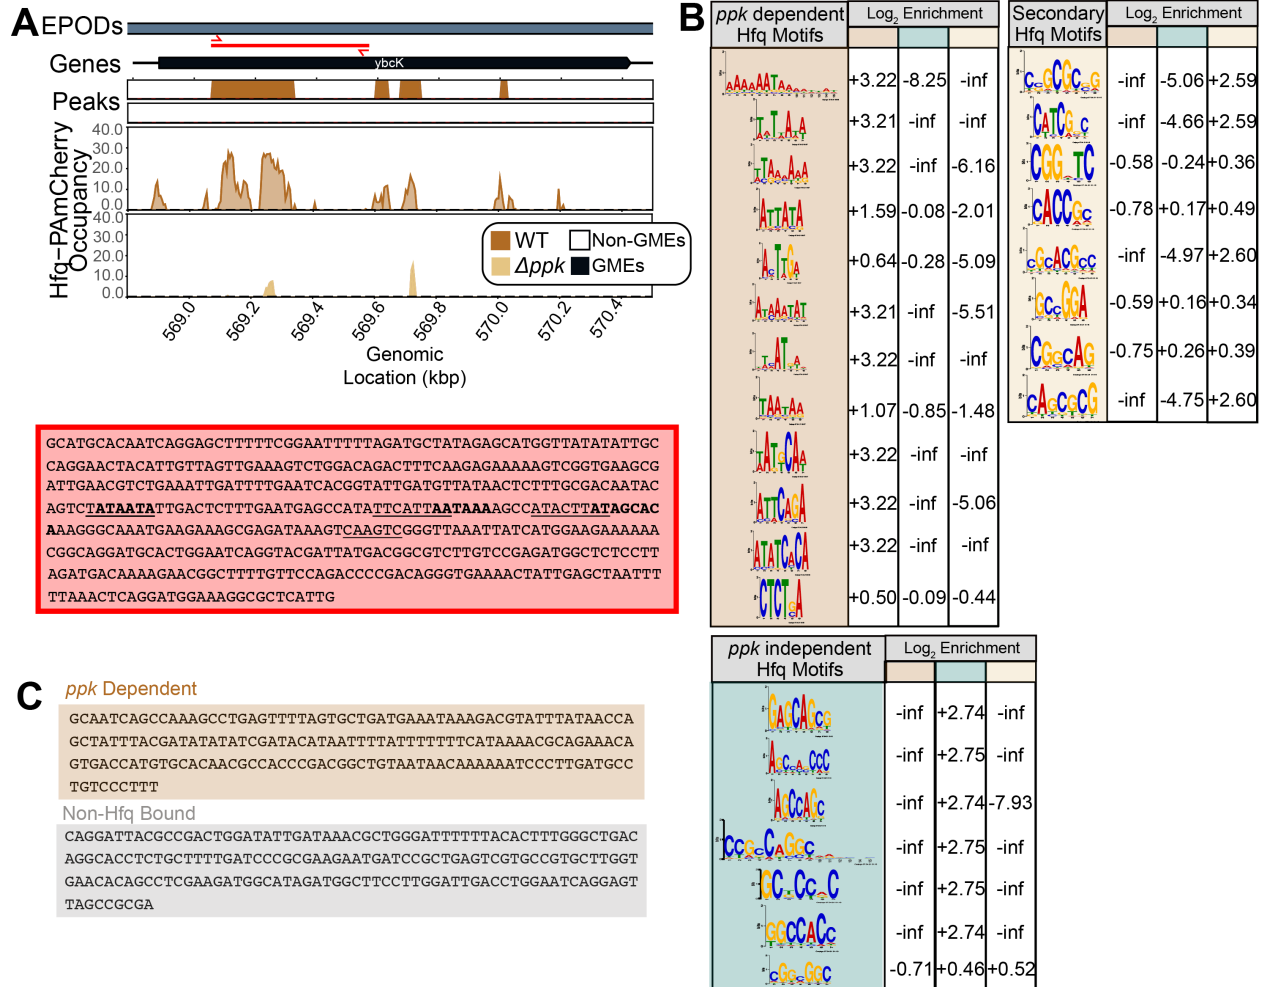

**Fig. S3. Absence of *ppk* changes DNA binding specificity of Hfq**

(A) Genomic region containing a *ppk* dependent Hfq peak within a GME spanning the *ybcK*-gene. This sequence was selected for *in vitro* analysis. *Ppk*-dependent Hfq motifs (underlined and bolded to distinguish motifs that overlap) are indicated. (B) Results of Multiple Em for Motif Elicitation (MEME) finder for *ppk*-dependent Hfq motifs (brown), *ppk*-independent Hfq motifs (green), and secondary Hfq motifs (gold). The log<sub>2</sub> motif enrichment was calculated across each category to demonstrate the specificity of the motif for its specified category. (C) Select *ppk*-dependent and non-Hfq binding DNA sequences used in this study.

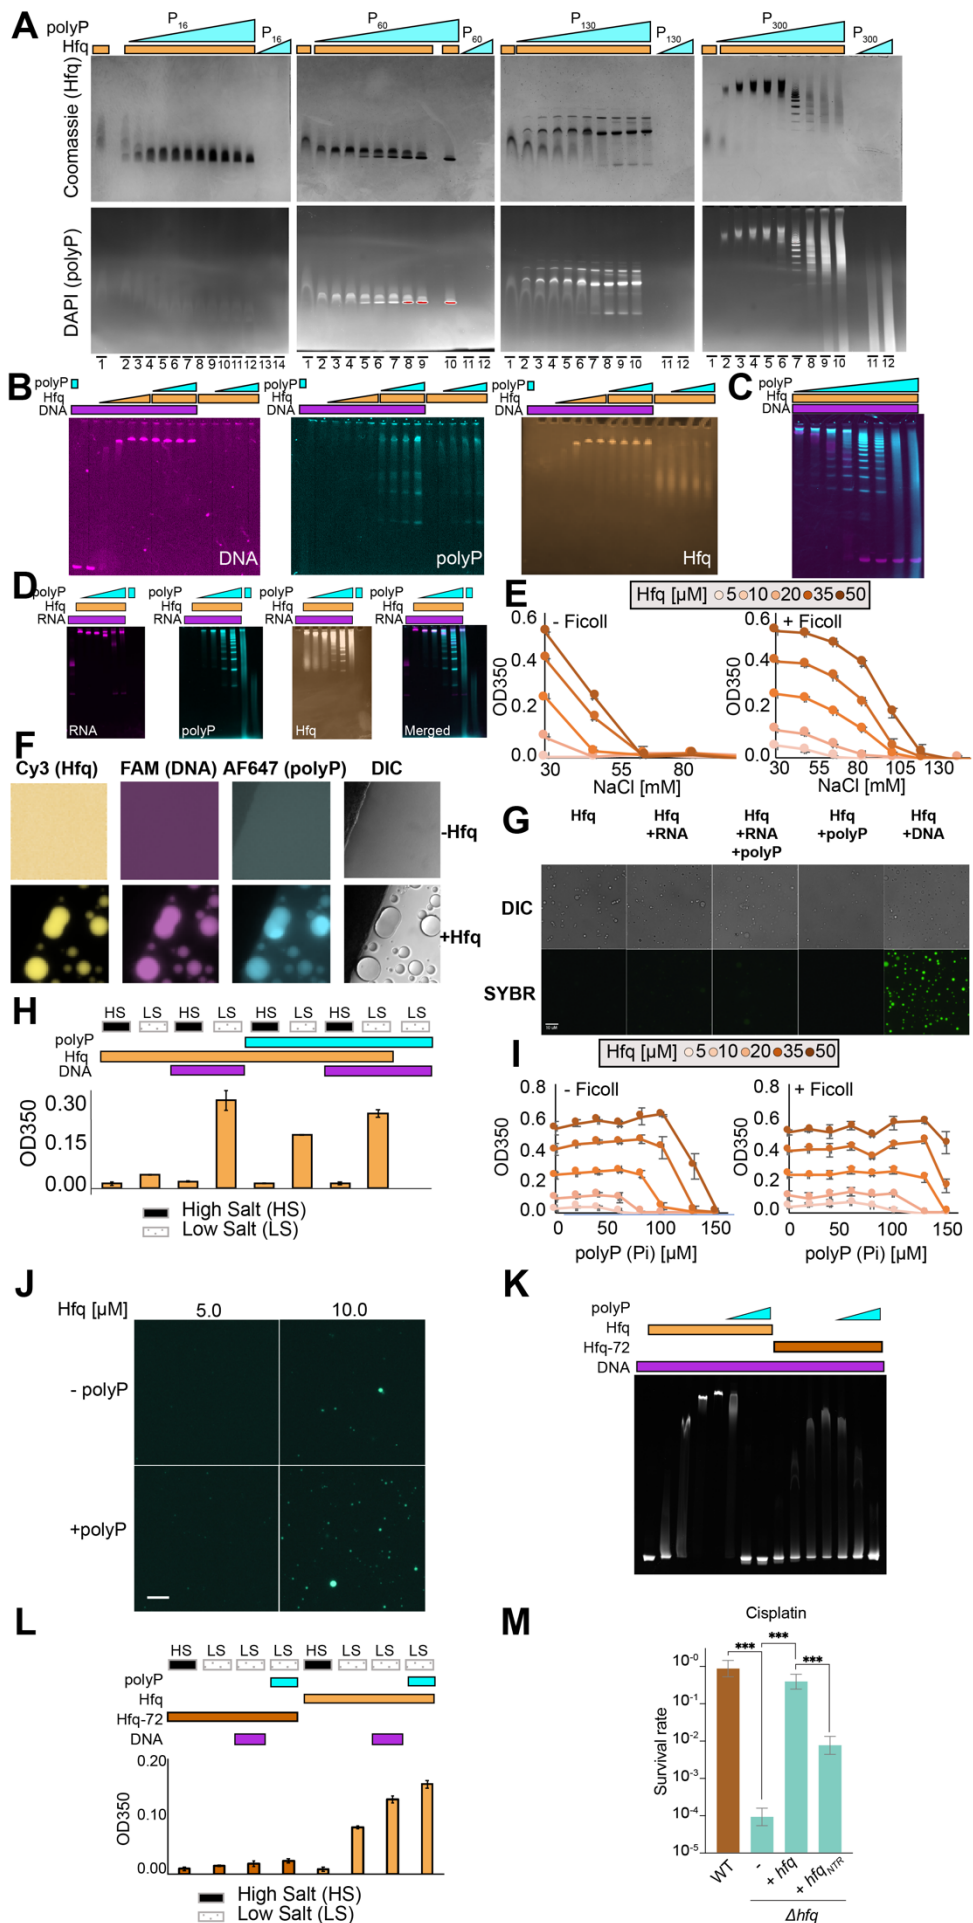

**Fig. S4: *In vitro* polyP-Hfq-DNA interactions**

**(A)** Mobility of Hfq (25  $\mu$ M) on native gels without or with 25, 50, 62.5, 75, 100, 125, 250, 375 or 500  $\mu$ M of polyP16, polyP60, polyP130, polyP300; polyP alone was analyzed at either 250 or 500  $\mu$ M. Gels were stained with DAPI to visualize polyP (lower panel) followed by Coomassie staining to visualize Hfq (upper panel). **(B)** EMSA of FAM-labeled *ybck*-DNA (75 nM) with 30  $\mu$ M AF647-polyP300 (lane 1), alone (lane 2) or with 5, 10, 17.5 or 25  $\mu$ M Hfq (lanes 3-6). 0, 10, 15, 20 or 30  $\mu$ M AF647-polyP300 (in Pi units) was added to 25  $\mu$ M Hfq and DNA (lane 6-10) or Hfq alone (11-15). DNA and polyP were visualized using fluorescence imager. Gels were stained with Coomassie to detect Hfq. **(C)** EMSA of 70 nM *ybck*-DNA in the presence of 25  $\mu$ M Hfq and increasing concentrations of polyP300 (20, 30, 50, 100, 150, 200, 300, 500  $\mu$ M). **(D)** EMSA of 50 nM *essD* RNA in the presence of 25  $\mu$ M Hfq and increasing concentrations of AF647-polyP300 (25, 50, 125, 250, 500  $\mu$ M). Gel was stained with SYBR safe to visualize RNA, and AF647-polyP300 was visualized using a fluorescence imager. Gel was stained with Coomassie to detect Hfq. **(E)** Turbidity of different concentrations of Hfq (stored in 300 mM NaCl) upon 1:10 dilution into buffer containing the indicated concentrations of NaCl without or with 10% w/v ficoll70. The final Hfq concentrations are depicted in the figure. Turbidity at 350 nm was monitored. **(F)** Microscopic analysis of liquid droplet formation of 100 nM FAM-labelled DNA-fragment and 100  $\mu$ M AF647-labelled polyP300 in the absence (upper panel) or presence (lower panel) of 100  $\mu$ M Hfq, supplemented with 0.8  $\mu$ M Cy3-labeled Hfq-S65C, under low salt conditions. **(G)** Microscopic analysis of liquid droplet formation of 50  $\mu$ M Hfq in the presence or absence of 75 nM *essD* RNA, 75 nM *ppk*-dependent DNA and/or 50  $\mu$ M polyP300 under low salt conditions. Samples were supplemented with 1:10,000 diluted SYBR Safe to visualize the nucleotides. **(H)** Turbidity of 500  $\mu$ M Hfq (stored in 300 mM NaCl) upon 1:10 dilution into buffer containing either no additional salt (low salt) or 270 mM NaCl (high salt) in the absence or presence of 50 nM *ybck*-DNA and/or 15  $\mu$ M polyP300. Turbidity at 350 nm was monitored. **(I)** Turbidity of different concentrations of Hfq (stored in 300 mM NaCl) upon 1:10 dilution into buffer containing the indicated concentrations of polyP<sub>300</sub> without or with 10% w/v ficoll-70. The final Hfq concentrations are depicted in the figure. Turbidity at 350 nm was monitored. All experiments in this figure were repeated at least 3 times and the mean +/- Std is shown. **(J)** Microscopic analysis of liquid droplet formation of 5 or 10  $\mu$ M Hfq in the absence (upper panel) or presence (lower panel) of equimolar polyP<sub>300</sub>, supplemented with 0.08  $\mu$ M Cy3-labeled Hfq-S65C, under low salt conditions. Scale bar represents 10  $\mu$ m. **(K)** EMSA of 75 nM *ybck*-DNA in the absence (lane 1) or presence of 5, 10, 17.5 or 25  $\mu$ M Hfq (lanes 2-5) or Hfq-72 (lanes 9-12). 50, 125 or 250  $\mu$ M of polyP300 was added to 25  $\mu$ M Hfq (lanes 6-8) or Hfq-72 (lanes 13-15) and DNA. Gel was stained with SYBR Safe to visualize DNA. **(L)** Turbidity of 250  $\mu$ M Hfq-72 or full-length Hfq (stored in 300 mM NaCl) upon 1:10 dilution into buffer containing either no additional salt (low salt) or 270 mM NaCl (high salt) in the absence or presence of 30 nM *ppk*-dependent DNA or 20  $\mu$ M polyP300. Turbidity at 350 nm was monitored. **(M)** Survival of MG1655 wild-type or the *ppk* deletion strain expressing either *hfq* or *hfq-72* from a plasmid in the presence of 4  $\mu$ g/ $\mu$ l cisplatin. \*\*\* indicates a greater than 99.5% posterior probability that the indicated survival rates differ (using a Bayesian analysis of the survival data; see Methods for details).

**Table S1. Strains, Plasmids and Oligos used in this study**

| <b>Relevant Genotype</b>                                                                                           | <b>Markers</b> | <b>Source</b> |
|--------------------------------------------------------------------------------------------------------------------|----------------|---------------|
| BL21 (DE3) ( <i>F- ompT gal dcm lon hsdSB(rB- mB-) λ(DE3 [lacI lacUV5-T7 gene 1 ind1 sam7 nin5]) ykgD::cat+ </i> ) |                |               |
| MG1655 ( <i>F-, λ-, rph-1 ilvG- rfb-50</i> )                                                                       |                | (43)          |
| MG1655 $\Delta ppk$                                                                                                |                | (3)           |
| MG1655 $\Delta hfq$                                                                                                |                | this study    |
| MG1655 $\Delta hfq\Delta ppk$                                                                                      |                | this study    |
| MG1655 $\Delta fis$                                                                                                |                | this study    |
| MG1655 $\Delta fis\Delta ppk$                                                                                      |                | this study    |
| MG1655 $\Delta hns$                                                                                                |                | this study    |
| MG1655 $\Delta hns\Delta ppk$                                                                                      |                | this study    |
| MG1655 $\Delta hupA$                                                                                               |                | this study    |
| MG1655 $\Delta hupA\Delta ppk$                                                                                     |                | this study    |
| MG1655 $\Delta hupB$                                                                                               |                | this study    |
| MG1655 $\Delta hupB\Delta ppk$                                                                                     |                | this study    |
| MG1655 $\Delta stpA$                                                                                               |                | this study    |
| MG1655 $\Delta stpA\Delta ppk$                                                                                     |                | this study    |
| MDS42                                                                                                              |                | (46)          |
| MDS42 $\Delta ppk$                                                                                                 |                | this study    |
| MDS42 $\Delta hfq$                                                                                                 |                | this study    |
| MG1655 pBAD18b                                                                                                     | amp            | (3)           |
| MG1655 $\Delta ppk$ pBAD18b                                                                                        | amp            | (3)           |
| MG1655 pBAD18b- <i>ppk</i>                                                                                         | amp            | (3)           |
| MG1655 $\Delta ppk$ pBAD18b <i>ppk</i>                                                                             | amp            | (3)           |
| MG1655 pBAD18b- <i>hfq</i>                                                                                         | amp            | this study    |
| MG1655 $\Delta ppk$ pBAD18b- <i>hfq</i>                                                                            | amp            | this study    |
| MG1655 $\Delta hfq$ pBAD18b- <i>hfq</i>                                                                            | amp            | this study    |
| MG1655 $\Delta hfq$ pBAD18b- <i>hfq</i>                                                                            | amp            | this study    |
| MG1655 $\Delta hfq$ pBAD18b- <i>hfq-72</i>                                                                         | amp            | this study    |
| MG1655 <i>hfq-PAmcherry</i>                                                                                        |                | this study    |
| MG1655 <i>hfq-PAmcherry</i> $\Delta ppk$                                                                           |                | this study    |
| BL21(DE3) pET21a- <i>hfq</i>                                                                                       | amp            | this study    |
| BL21(DE3) pET21a- <i>hfqS65C</i>                                                                                   | amp            | this study    |
| BL21(DE3) pET21a- <i>hfq-72</i>                                                                                    | amp            | this study    |
| MG1655 mal::lacIq $\Delta araBAD$ lacI'-PBAD::cat-sacB::lacZ                                                       | cm             | (20)          |
| MG1655 mal::lacIq $\Delta araBAD$ lacI':PBAD-ompX-lacZ                                                             |                | (20)          |
| MG1655 mal::lacIq $\Delta araBAD$ lacI':PBAD-ompX-lacZ $\Delta hfq$ ::cat-sacB                                     | cm             | (20)          |



|                                                                                          |        |            |
|------------------------------------------------------------------------------------------|--------|------------|
| MG1655 mal::lacIq ΔaraBAD lacI':PBAD-rpoS-lacZ                                           |        | (20)       |
| MG1655 mal::lacIq ΔaraBAD lacI':PBAD-rpoS-lacZ Δhfq::cat-sacB purA+                      | cm     | (20)       |
| MG1655 mal::lacIq ΔaraBAD lacI':PBAD-flhD-lacZ                                           |        | (20)       |
| MG1655 mal::lacIq ΔaraBAD lacI':PBAD-flhD-lacZ Δhfq::cat-sacB purA+                      | cm     | (20)       |
| MG1655 mal::lacIq ΔaraBAD lacI':PBAD -chiP-lacZ                                          |        | (20)       |
| MG1655mal::lacIq ΔaraBAD lacI':PBAD -chiP-lacZ Δhfq::cat-sacB purA+                      | cm     | (20)       |
| MG1655 mal::lacIq ΔaraBAD lacI': PBAD -sodB-lacZ                                         |        | (20)       |
| MG1655 mal::lacIq ΔaraBAD lacI': PBAD -sodB-lacZ Δhfq::cat-sacB purA+                    | cm     | (20)       |
| MG1655 mal::lacIq ΔaraBAD lacI':PBAD-219sdhC-lacZ                                        |        | (9)        |
| MG1655 mal::lacIq ΔaraBAD lacI':PBAD-219sdhC-lacZ Δhfq::cat-sacB purA+                   | cm     | (20)       |
| MG1655 mal::lacIq ΔaraBAD lacI'-P <sub>BAD</sub> ::cat-sacB::lacZ ppk::kan               | cm kan | this study |
| MG1655 mal::lacIq ΔaraBAD lacI':PBAD-ompX-lacZ ppk::kan                                  | cm kan | this study |
| MG1655 mal::lacIq ΔaraBAD lacI':PBAD-ompX-lacZ Δhfq::cat-sacB ppk::kan                   | cm kan | this study |
| MG1655 mal::lacIq ΔaraBAD lacI':PBAD-rpoS-lacZ ppk::kan                                  | cm kan | this study |
| MG1655 mal::lacIq ΔaraBAD lacI':PBAD-rpoS-lacZ Δhfq::cat-sacB purA+ ppk::kan             | cm kan | this study |
| MG1655 mal::lacIq ΔaraBAD lacI':PBAD-flhD-lacZ ppk::kan                                  | cm kan | this study |
| MG1655 mal::lacIq ΔaraBAD lacI':PBAD-flhD-lacZ Δhfq::cat-sacB purA+ ppk::kan             | cm kan | this study |
| MG1655 mal::lacIq ΔaraBAD lacI':PBAD -chiP-lacZ ppk::kan                                 | cm kan | this study |
| MG1655 mal::lacIq ΔaraBAD lacI':PBAD -chiP-lacZ Δhfq::cat-sacB purA+ ppk::kan            | cm kan | this study |
| MG1655 mal::lacIq ΔaraBAD lacI': PBAD -sodB-lacZ ppk::kan                                | cm kan | this study |
| MG1655 mal::lacIq ΔaraBAD lacI': PBAD -sodB-lacZ Δhfq::cat-sacB purA+ ppk::kan           | cm kan | this study |
| MG1655 mal::lacIq ΔaraBAD lacI':PBAD-219sdhC-lacZ ppk::kan                               | cm kan | this study |
| MG1655 mal::lacIq ΔaraBAD lacI':PBAD-219sdhC-lacZ Δhfq::cat-sacB purA+ ppk::kan          | cm kan | this study |
| MG1655 mal::lacIq ΔaraBAD lacI'-PBAD::cat-sacB::lacZ pBR-plac                            | amp    | this study |
| MG1655 mal::lacIq ΔaraBAD lacI':PBAD-rpoS-lacZ pBRplac- <i>dsrA</i>                      | amp    | this study |
| MG1655 mal::lacIq ΔaraBAD lacI':PBAD-rpoS-lacZ Δhfq::cat-sacB purA+ pBRplac- <i>dsrA</i> | amp cm | this study |
| MG1655 mal::lacIq ΔaraBAD lacI':PBAD-rpoS-lacZ pBRplac- <i>arcZ</i>                      | amp    | this study |
| MG1655 mal::lacIq ΔaraBAD lacI':PBAD-rpoS-lacZ Δhfq::cat-sacB purA+ pBRplac- <i>arcZ</i> | amp cm | this study |

| MG1655 mal::lacIq ΔaraBAD lacI':PBAD-flhD-lacZ pBRplac-arcZ                                  | amp                                                   | this study |         |
|----------------------------------------------------------------------------------------------|-------------------------------------------------------|------------|---------|
| MG1655 mal::lacIq ΔaraBAD lacI':PBAD-flhD-lacZ Δhfq::cat-sacB purA+ pBRplac-arcZ             | amp cm                                                | this study |         |
| MG1655 mal::lacIq ΔaraBAD lacI':PBAD-flhD-lacZ pBRplac-McaS                                  | amp                                                   | this study |         |
| MG1655 mal::lacIq ΔaraBAD lacI':PBAD-flhD-lacZ Δhfq::cat-sacB purA+ pBRplac-McaS             | amp cm                                                | this study |         |
| MG1655 mal::lacIq ΔaraBAD lacI': PBAD -sodB-lacZ pBRplac-RyhB                                | amp                                                   | this study |         |
| MG1655 mal::lacIq ΔaraBAD lacI': PBAD -sodB-lacZ Δhfq::cat-sacB purA+ pBRplac-RyhB           | amp cm                                                | this study |         |
| MG1655 mal::lacIq ΔaraBAD lacI':PBAD-219sdhC-lacZ pBRplac-RyhB                               | amp                                                   | this study |         |
| MG1655 mal::lacIq ΔaraBAD lacI':PBAD-219sdhC-lacZ Δhfq::cat-sacB purA+ pBRplac-ryhB          | amp cm                                                | this study |         |
| MG1655 mal::lacIq ΔaraBAD lacI'-PBAD::cat-sacB::lacZ ppk::kan pBR-plac                       | amp kan                                               | this study |         |
| MG1655 mal::lacIq ΔaraBAD lacI':PBAD-rpoS-lacZ ppk::kan pBRplac-dsrA                         | amp kan                                               | this study |         |
| MG1655 mal::lacIq ΔaraBAD lacI':PBAD-rpoS-lacZ Δhfq::cat-sacB purA+ ppk::kan pBRplac-dsrA    | amp cm<br>kan                                         | this study |         |
| MG1655 mal::lacIq ΔaraBAD lacI':PBAD-rpoS-lacZ ppk::kan pBRplac-arcZ                         | amp kan                                               | this study |         |
| MG1655 mal::lacIq ΔaraBAD lacI':PBAD-rpoS-lacZ Δhfq::cat-sacB purA+ ppk::kan pBRplac-arcZ    | amp cm<br>kan                                         | this study |         |
| MG1655 mal::lacIq ΔaraBAD lacI':PBAD-flhD-lacZ ppk::kan pBRplac-arcZ                         | amp kan                                               | this study |         |
| MG1655 mal::lacIq ΔaraBAD lacI':PBAD-flhD-lacZ Δhfq::cat-sacB purA+ ppk::kan pBRplac-arcZ    | amp cm<br>kan                                         | this study |         |
| MG1655 mal::lacIq ΔaraBAD lacI':PBAD-flhD-lacZ ppk::kan pBRplac-mcaS                         | amp kan                                               | this study |         |
| MG1655 mal::lacIq ΔaraBAD lacI':PBAD-flhD-lacZ Δhfq::cat-sacB purA+ ppk::kan pBRplac-mcaS    | amp cm<br>kan                                         | this study |         |
| MG1655 mal::lacIq ΔaraBAD lacI': PBAD -sodB-lacZ ppk::kan pBRplac-ryhB                       | amp kan                                               | this study |         |
| MG1655 mal::lacIq ΔaraBAD lacI': PBAD -sodB-lacZ Δhfq::cat-sacB purA+ ppk::kan pBRplac-ryhB  | amp cm<br>kan                                         | this study |         |
| MG1655 mal::lacIq ΔaraBAD lacI':PBAD-219sdhC-lacZ ppk::kan pBRplac-ryhB                      | amp kan                                               | this study |         |
| MG1655 mal::lacIq ΔaraBAD lacI':PBAD-219sdhC-lacZ Δhfq::cat-sacB purA+ ppk::kan pBRplac-ryhB | amp cm<br>kan                                         | this study |         |
| Plasmid                                                                                      | Description                                           | Marker (s) | Source  |
| pBAD18b                                                                                      | cloning vector with PBAD arabinose-inducible promoter | amp        | (60)    |
| pKD46                                                                                        | λ Red recombinase                                     | amp        | (44)    |
| pCP20                                                                                        | Flp recombinase                                       | amp        | (44)    |
| pKD3                                                                                         | cat chloramphenicol resistance cassette donor         | cat        | (44)    |
| pKD4                                                                                         | Kan Kanamycin resistance cassette donor               | Kan        | (44)    |
| pet21a                                                                                       | IPTG inducible vector for protein purification        | amp        | Novagen |

|                         |                                                               |     |            |
|-------------------------|---------------------------------------------------------------|-----|------------|
| pBAD18b- <i>hfq</i>     | <i>hfq</i> arabinose inducible expressing vector              | amp | this study |
| pBAD18b- <i>hfq-72</i>  | <i>Hfq-NTR (1-72)</i> arabinose inducible expressing vector   | amp | this study |
| pBAD18b- <i>ppk</i>     | <i>ppk</i> arabinose inducible expression vector              | amp | (3)        |
| pBR-plac                | IPTG inducible empty expression vector                        | amp | (20)       |
| pBRplac- <i>dsrA</i>    | IPTG inducible <i>dsrA</i> sRNA expression vector             | amp | (20)       |
| pBRplac- <i>arcZ</i>    | IPTG inducible <i>arcZ</i> sRNA expression vector             | amp | (20)       |
| pBRplac- <i>mcaS</i>    | IPTG inducible <i>mcaS</i> sRNA expression vector             | amp | (20)       |
| pBRplac- <i>ryhB</i>    | IPTG inducible <i>ryhB</i> sRNA expression vector             | amp | (20)       |
| pet21a- <i>hfq</i>      | IPTG inducible <i>hfq</i> vector for protein purification     | amp | this study |
| pET-21a- <i>hfqS65C</i> | IPTG inducible <i>hfqS65C</i> vector for protein purification | amp | this study |
| pet21a- <i>hfq-72</i>   | IPTG inducible <i>hfq-72</i> vector for protein purification  | amp | this study |

| Oligonucleotides <sup>2</sup> | Sequence                                                      |
|-------------------------------|---------------------------------------------------------------|
| pBAD_F                        | CTGTTTCTCCATACCCGTT                                           |
| pBAD_R                        | GGCTGAAAATCTTCTCTCAT                                          |
| ppk_lambdared_F               | ATGGGTCAGGAAAAGCTATACATCGAAAAAGAGCTCGTGTAG<br>GCTGGAGCTGCTTC  |
| ppk_lambdared_R               | TTATTCAGGTTGTTTCGAGTGATTTGATGTAGTCATACATATGA<br>ATATCCTCCTTA  |
| ppk_F                         | CGTAATTAAGCGCCAGCTC                                           |
| ppk_R                         | ATCTGCATGGCACCATCTAC                                          |
| hfq_pet21_F_NdeI              | GTGATCATATGGCTAAGGGGCAATCTTTACAAG                             |
| hfq_pet21_R_XhoI              | GATACCTCGAGTTATTCGGTTTCTTCGCTGTCCTGTTGC                       |
| hupA_F                        | CTGATTTGTCGTACCTGGAG                                          |
| hupA_R                        | GACTACAGGCAGTGAGAAGC                                          |
| hupB_F                        | TGTCTCGCTAAGTTAGATGG                                          |
| hupB_R                        | CAATTGTCAGCCCACAAGAC                                          |
| stpA_F                        | GGAATTAGCGAGCAGAGAGC                                          |
| stpA_R                        | TACTGTTTGCAGGAATCAGC                                          |
| hfq_F                         | GTATTACAGGTTGTTGGTGC                                          |
| hfq_R                         | AGACCAGAGATTCAAACCTCC                                         |
| hfq_lambdared_F               | ATGGCTAAGGGGCAATCTTTACAAGATCCGTTCCCTGGTGTAG<br>GCTGGAGCTGCTTC |
| hfq_lambdared_R               | TTATTCGGTTTCTTCGCTGTCCTGTTGCGCGGAAGTCATATGA<br>ATATCCTCCTTA   |
| hns_F                         | CTCAACAAACCACCCCAATA                                          |
| hns_R                         | TGGCGGGATTTTAAGCAAGT                                          |
| hns_lambdared_F               | CCTCAACAAACCACCCCAATATAAGTTTGAGATTACTACAGT                    |

|                         |                                                                  |
|-------------------------|------------------------------------------------------------------|
|                         | GTAGGCTGGAGCTGCTTC                                               |
| hns_lambdared_R         | GCCGCTGGCGGGATTTTAAGCAAGTGCAATCTACAAAAGACA<br>TATGAATATCCTCCTTAG |
| fis_F                   | GCACATCAACGCCATTGAG                                              |
| fis_R                   | GGTCACTCCCTTTGTGACAC                                             |
| fis_lambdared_F         | ATGTTCGAACAAACGCGTAAATTCTGACGTACTGACCGTGTAG<br>GCTGGAGCTGCTTC    |
| fis_lambdared_R         | TTAGTTCATGCCGTATTTTTTCAATTTTTTACGCAGCATATGAA<br>TATCCTCCTTA      |
| hfq_F_BamHI             | TCGGATCCGCATATAAGGAAAAGAGAGA                                     |
| hfq_R_HindIII           | TCAAGCTTCCGAAACCTTATTCGGTTTC                                     |
| cycA_F                  | ACTCTGATGCCGGTAGGTTT                                             |
| cycA_R                  | GCGCCATCCAGCATGATA                                               |
| HEX-nohD_F              | TCTCTAGAGAAAGGGATGCTGAAATTGAG                                    |
| HEX-ipex_F              | TCGAATTCAGGTTGTGCTTCTAAAGGAAG                                    |
| HEX-cynR-cynT_F         | TCGAATTCGGTGAAGCTGCCATGTTTCCAG                                   |
| cynR-cynT_R             | TCGGTACCGCTGTTTAAACAAGGCTTCC                                     |
| ipex_R                  | TCGGTACCCACCTTCCCTAAAGCACTCG                                     |
| nohD_R                  | TCAAGCTTCATTCACCTCACGGATGTAG                                     |
| YfcK_F                  | GCATGCACAATCAGGAGCTT                                             |
| YfcK_R                  | CAATGAGCGCCTTTCCATCC                                             |
| <i>Ppk</i> -dependent_F | GCAATCAGCCAAAGCCTGAG                                             |
| <i>Ppk</i> -dependent_R | AAAGGGACAGGCATCAAGGG                                             |
| Non-binding site_F      | CAGGATTACGCCGACTGGAT                                             |
| Non-binding site_R      | TCGCGGCTAACTCCTGATTC                                             |
| Hfq_S65C_F              | CGATTTCTACTGTTGTCCCGTGTGCGCCCGGTTT                               |
| Hfq_S65C_R              | AAACCGGGCGACACGGGACAACAGTAGAAATCG                                |
| EssD_T7-F               | TAATACGACTCACTATAGATAAATATTCATCTAATCAATGTGA<br>TTAT              |
| EssD_T7-R               | CACCCGTTGTAACTTATC                                               |

<sup>1</sup>:amp, ampicillin; kan, Kanamycin; cm, chloramphenicol. <sup>2</sup>: F: forward primer; R: reverse primer.

**Movie S1.** Liquid-liquid phase separation of 50  $\mu\text{M}$  purified Hfq in 25 mM Tris, 30 mM NaCl, pH 7.5.

**Movie S2.** Liquid-liquid phase separation of 100  $\mu\text{M}$  purified Hfq in 25 mM Tris, 30 mM NaCl, pH 7.5.

**Movie S3.** Liquid-liquid phase separation of 400  $\mu\text{M}$  purified Hfq in 25 mM Tris, 30 mM NaCl, pH 7.5.

**Movie S4.** Fluorescence recovery upon photobleaching of 100  $\mu\text{M}$  purified Hfq supplemented with 0.8  $\mu\text{M}$  Cy3-labeled Hfq-S65C in 25 mM Tris, 30 mM NaCl, pH 7.5.

**Movie S5.** Fluorescence recovery upon photobleaching of 100  $\mu\text{M}$  purified Hfq supplemented with 0.8  $\mu\text{M}$  Cy3-labeled Hfq-S65C in the presence of 100 nM FAM-labeled DNA fragment in 25 mM Tris, 30 mM NaCl, pH 7.5.

**Movie S6.** Fluorescence recovery upon photobleaching of 100  $\mu\text{M}$  purified Hfq supplemented with 0.8  $\mu\text{M}$  Cy3-labeled Hfq-S65C in the presence of 100  $\mu\text{M}$  AF647-labeled polyP<sub>300</sub> in 25 mM Tris, 30 mM NaCl, pH 7.5.

**Movie S7.** Fluorescence recovery upon photobleaching of 100  $\mu\text{M}$  purified Hfq supplemented with 0.8  $\mu\text{M}$  Cy3-labeled Hfq-S65C and 100  $\mu\text{M}$  AF647-labeled polyP<sub>300</sub> in 25 mM Tris, 30 mM NaCl, pH 7.5.

**Data S1.** Locations of all prophages and mobile genetic elements (MGEs) as used in the present analysis, defined based on data from Ecocyc (27).

**Data S2.** Locations of EPODs in wild type MG1655 during growth in M9/RDM/glucose media.

## REFERENCES AND NOTES

1. M. R. Brown, A. Kornberg, Inorganic polyphosphate in the origin and survival of species. *Proc. Natl. Acad. Sci. U.S.A.* **101**, 16085–16087 (2004).
2. L. Xie, A. Rajpurkar, E. Quarles, N. Taube, A. S. Rai, J. Erba, B. Sliwinski, M. Markowitz, U. Jakob, D. Knoefler, Accumulation of nucleolar inorganic polyphosphate is a cellular response to cisplatin-induced apoptosis. *Front. Oncol.* **9**, 1410 (2019).
3. M. J. Gray, W. Y. Wholey, N. O. Wagner, C. M. Cremers, A. Mueller-Schickert, N. T. Hock, A. G. Krieger, E. M. Smith, R. A. Bender, J. C. A. Bardwell, U. Jakob, Polyphosphate is a primordial chaperone. *Mol. Cell* **53**, 689–699 (2014).
4. F. Beaufay, E. Quarles, A. Franz, O. Katamanin, W.-Y. Wholey, U. Jakob, Polyphosphate functions in vivo as an iron chelator and fenton reaction inhibitor. *MBio* **11**, 4 (2020).
5. A. Du Toit, Phage induction in different contexts. *Nat. Rev. Microbiol.* **17**, 126–127 (2019).
6. G. Pósfai, G. Plunkett III, T. Fehér, D. Frisch, G. M. Keil, K. Umenhoffer, V. Kolisnychenko, B. Stahl, S. S. Sharma, M. de Arruda, V. Burland, S. W. Harcum, F. R. Blattner, Emergent properties of reduced-genome *Escherichia coli*. *Science* **312**, 1044–1046 (2006).
7. R. P. Rastogi, Richa, A. Kumar, M. B. Tyagi, R. P. Sinha, Molecular mechanisms of ultraviolet radiation-induced DNA damage and repair. *J. Nucleic Acids* **2010**, 592980 (2010).
8. T. Feher, B. Cseh, K. Umenhoffer, I. Karcagi, G. Posfai, Characterization of *cycA* mutants of *Escherichia coli*. An assay for measuring in vivo mutation rates. *Mutat. Res.* **595**, 184–190 (2006).
9. D. J. Jin, C. A. Gross, Mapping and sequencing of mutations in the *Escherichia coli* *rpoB* gene that lead to rifampicin resistance. *J. Mol. Biol.* **202**, 45–58 (1988).
10. N. N. Rao, M. R. Gomez-Garcia, A. Kornberg, Inorganic polyphosphate: Essential for growth and survival. *Annu. Rev. Biochem.* **78**, 605–647 (2009).

11. K. Murata, S. Hagiwara, Y. Kimori, Y. Kaneko, Ultrastructure of compacted DNA in cyanobacteria by high-voltage cryo-electron tomography. *Sci. Rep.* **6**, 34934 (2016).
12. R. T. Dame, The role of nucleoid-associated proteins in the organization and compaction of bacterial chromatin. *Mol. Microbiol.* **56**, 858–870 (2005).
13. J. McQuail, A. Switzer, L. Burchell, S. Wigneshweraraj, The RNA-binding protein Hfq assembles into foci-like structures in nitrogen starved *Escherichia coli*. *J. Biol. Chem.* **295**, 12355–12367 (2020).
14. I. Moll, D. Leitsch, T. Steinhauser, U. Blasi, RNA chaperone activity of the Sm-like Hfq protein. *EMBO Rep.* **4**, 284–289 (2003).
15. K. M. Wassarman, F. Repoila, C. Rosenow, G. Storz, S. Gottesman, Identification of novel small RNAs using comparative genomics and microarrays. *Genes Dev.* **15**, 1637–1651 (2001).
16. J. Orans, A. R. Kovach, K. E. Hoff, N. M. Horstmann, R. G. Brennan, Crystal structure of an *Escherichia coli* Hfq Core (residues 2-69)-DNA complex reveals multifunctional nucleic acid binding sites. *Nucleic Acids Res.* **48**, 3987–3997 (2020).
17. A. Takada, M. Wachi, A. Kaidow, M. Takamura, K. Nagai, DNA binding properties of the hfq gene product of *Escherichia coli*. *Biochem. Biophys. Res. Commun.* **236**, 576–579 (1997).
18. M. Kajitani, A. Kato, A. Wada, Y. Inokuchi, A. Ishihama, Regulation of the *Escherichia coli* hfq gene encoding the host factor for phage Q beta. *J. Bacteriol.* **176**, 531–534 (1994).
19. G. W. Li, D. Burkhardt, C. Gross, J. S. Weissman, Quantifying absolute protein synthesis rates reveals principles underlying allocation of cellular resources. *Cell* **157**, 624–635 (2014).
20. A. Zhang, D. J. Schu, B. C. Tjaden, G. Storz, S. Gottesman, Mutations in interaction surfaces differentially impact *E. coli* Hfq association with small RNAs and their mRNA targets. *J. Mol. Biol.* **425**, 3678–3697 (2013).

21. T. Vora, A. K. Hottes, S. Tavazoie, Protein occupancy landscape of a bacterial genome. *Mol. Cell* **35**, 247–253 (2009).
22. P. L. Freddolino, H. M. Amemiya, T. J. Goss, S. Tavazoie, Dynamic landscape of protein occupancy across the *Escherichia coli* chromosome. *PLoS Biol.* **19**, e3001306 (2021).
23. H.M. Amemiya, T.J. Goss, T.M. Nye, R. Hurto, L. A. Simmons, P.L.Freddolino, Distinct heterochromatin-like domains promote transcriptional memory and silence parasitic genetic elements in bacteria. *EMBO J.*, in press.
24. C. Sauter, J. Basquin, D. Suck, Sm-like proteins in Eubacteria: The crystal structure of the Hfq protein from *Escherichia coli*. *Nucleic Acids Res.* **31**, 4091–4098 (2003).
25. S. Melamed, A. Peer, R. Faigenbaum-Romm, Y. E. Gatt, N. Reiss, A. Bar, Y. Altuvia, L. Argaman, H. Margalit, Global mapping of small RNA-target interactions in bacteria. *Mol. Cell* **63**, 884–897 (2016).
26. A. E. Posey, A. S. Holehouse, R. V. Pappu, Phase separation of intrinsically disordered proteins. *Methods Enzymol.* **611**, 1–30 (2018).
27. F. Erdel, K. Rippe, Formation of chromatin subcompartments by phase separation. *Biophys. J.* **114**, 2262–2270 (2018).
28. T. Ali Azam, A. Iwata, A. Nishimura, S. Ueda, A. Ishihama, Growth phase-dependent variation in protein composition of the *Escherichia coli* nucleoid. *J. Bacteriol.* **181**, 6361–6370 (1999).
29. T. B. Updegrove, J. J. Correia, R. Galletto, W. Bujalowski, R. M. Wartell, E. coli DNA associated with isolated Hfq interacts with Hfq's distal surface and C-terminal domain. *Biochim. Biophys. Acta* **1799**, 588–596 (2010).
30. T. B. Updegrove, A. Zhang, G. Storz, Hfq: The flexible RNA matchmaker. *Curr. Opin. Microbiol.* **30**, 133–138 (2016).



31. S. Panja, S. A. Woodson, Fluorescence reporters for Hfq oligomerization and RNA annealing. *Methods Mol. Biol.* **1259**, 369–383 (2015).
32. H. H. Tuson, J. S. Biteen, Unveiling the inner workings of live bacteria using super-resolution microscopy. *Anal. Chem.* **87**, 42–63 (2015).
33. A. S. Hansen, M. Woringer, J. B. Grimm, L. D. Lavis, R. Tjian, X. Darzacq, Robust model-based analysis of single-particle tracking experiments with Spot-On. *eLife* **7**, e33125 (2018).
34. M. Yousuf, I. Iuliani, R. T. Veetil, A. S. N. Seshasayee, B. Sclavi, M. C. Lagomarsino, Early fate of exogenous promoters in *E. coli*. *Nucleic Acids Res.* **48**, 2348–2356 (2020).
35. W. W. Navarre, S. Porwollik, Y. Wang, M. McClelland, H. Rosen, S. J. Libby, F. C. Fang, Selective silencing of foreign DNA with low GC content by the H-NS protein in *Salmonella*. *Science* **313**, 236–238 (2006).
36. B. A. Shen, R. Landick, Transcription of bacterial chromatin. *J. Mol. Biol.* **431**, 4040–4066 (2019).
37. K. Singh, J. N. Milstein, W. W. Navarre, Xenogeneic silencing and its impact on bacterial genomes. *Annu. Rev. Microbiol.* **70**, 199–213 (2016).
38. T. A. Azam, A. Ishihama, Twelve species of the nucleoid-associated protein from *Escherichia coli*. Sequence recognition specificity and DNA binding affinity. *J. Biol. Chem.* **274**, 33105–33113 (1999).
39. A. Malabirade, K. Jiang, K. Kubiak, A. Diaz-Mendoza, F. Liu, J. A. van Kan, J. F. Berret, V. Arluison, J. R. C. van der Maarel, Compaction and condensation of DNA mediated by the C-terminal domain of Hfq. *Nucleic Acids Res.* **45**, 7299–7308 (2017).
40. E. Fortas, F. Piccirilli, A. Malabirade, V. Militello, S. Trépout, S. Marco, A. Taghbalout, V. Arluison, New insight into the structure and function of Hfq C-terminus. *Biosci. Rep.* **35**, e00190 (2015).

41. A. G. Larson, D. Elnatan, M. M. Keenen, M. J. Trnka, J. B. Johnston, A. L. Burlingame, D. A. Agard, S. Redding, G. J. Narlikar, Liquid droplet formation by HP1 $\alpha$  suggests a role for phase separation in heterochromatin. *Nature* **547**, 236–240 (2017).
42. A. R. Strom, A. V. Emelyanov, M. Mir, D. V. Fyodorov, X. Darzacq, G. H. Karpen, Phase separation drives heterochromatin domain formation. *Nature* **547**, 241–245 (2017).
43. F. R. Blattner, G. Plunkett III, C. A. Bloch, N. T. Perna, V. Burland, M. Riley, J. Collado-Vides, J. D. Glasner, C. K. Rode, G. F. Mayhew, J. Gregor, N. W. Davis, H. A. Kirkpatrick, M. A. Goeden, D. J. Rose, B. Mau, Y. Shao, The complete genome sequence of *Escherichia coli* K-12. *Science* **277**, 1453–1462 (1997).
44. K. A. Datsenko, B. L. Wanner, One-step inactivation of chromosomal genes in *Escherichia coli* K-12 using PCR products. *Proc. Natl. Acad. Sci. U.S.A.* **97**, 6640–6645 (2000).
45. J. Salvatier, Thomas V. Wiecki, C. Fonnesbeck, Probabilistic programming in Python using PyMC3. *Peer J. Comput. Sci.* **2**, e55 (2016).
46. A. Ducret, E. M. Quardokus, Y. V. Brun, MicrobeJ, a tool for high throughput bacterial cell detection and quantitative analysis. *Nat. Microbiol.* **1**, 16077 (2016).
47. E. Laskowska, J. Bohdanowicz, D. Kuczyńska-Wiśnik, E. Matuszewska, S. Kędzierska, A. Taylor, Aggregation of heat-shock-denatured, endogenous proteins and distribution of the IbpA/B and Fda marker-proteins in *Escherichia coli* WT and *grpE280* cells. *Microbiology* **150**, 247–259 (2004).
48. J. Miller, *A Short Course in Bacterial Genetics—A Laboratory Manual and Handbook for Escherichia coli and Related Bacteria* (Cold Spring Harbor Laboratory Press, 1992).
49. N. L. Bray, H. Pimentel, P. Melsted, L. Pachter, Near-optimal probabilistic RNA-seq quantification. *Nat. Biotechnol.* **34**, 525–527 (2016).
50. H. Pimentel, N. L. Bray, S. Puente, P. Melsted, L. Pachter, Differential analysis of RNA-seq incorporating quantification uncertainty. *Nat. Methods* **14**, 687–690 (2017).

51. C. R. Harris, K. J. Millman, S. J. van der Walt, R. Gommers, P. Virtanen, D. Cournapeau, E. Wieser, J. Taylor, S. Berg, N. J. Smith, R. Kern, M. Picus, S. Hoyer, M. H. van Kerkwijk, M. Brett, A. Haldane, J. F. del Río, M. Wiebe, P. Peterson, P. Gérard-Marchant, K. Sheppard, T. Reddy, W. Weckesser, H. Abbasi, C. Gohlke, T. E. Oliphant, Array programming with NumPy. *Nature* **585**, 357–362 (2020).
52. H. Wickham, *ggplot2 - Elegant Graphics for Data Analysis* (Springer, 2009).
53. B. Demeler, G. E. Gorbet, Analytical ultracentrifugation data analysis with UltraScan-III, in *Analytical Ultracentrifugation*, S. Uchiyama, F. Arisaka, W. F. Stafford, T. Laue, Eds. (Springer, 2016), pp. 119–143.
54. B. Demeler, E. Brookes, L. Nagel-Steger, Analysis of heterogeneity in molecular weight and shape by analytical ultracentrifugation using parallel distributed computing. *Methods Enzymol.* **454**, 87–113 (2009).
55. E. Brookes, W. Cao, B. Demeler, A two-dimensional spectrum analysis for sedimentation velocity experiments of mixtures with heterogeneity in molecular weight and shape. *Eur. Biophys. J.* **39**, 405–414 (2010).
56. J. Lempart, E. Tse, J. A. Lauer, M. I. Ivanova, A. Sutter, N. Yoo, P. Huettemann, D. Southworth, U. Jakob, Mechanistic insights into the protective roles of polyphosphate against amyloid cytotoxicity. *Life Sci. Alliance* **2**, e201900486 (2019).
57. S. A. Smith, J. H. Morrissey, Sensitive fluorescence detection of polyphosphate in polyacrylamide gels using 4',6-diamidino-2-phenylindol. *Electrophoresis* **28**, 3461–3465 (2007).
58. C. Wong, S. Sridhara, J. C. Bardwell, U. Jakob, Heating greatly speeds Coomassie blue staining and destaining. *Biotechniques* **28**, 426–428, 430, 432 (2000).
59. B. P. Isaacoff, Y. Li, S. A. Lee, J. S. Biteen, SMALL-LABS: Measuring single-molecule intensity and position in obscuring backgrounds. *Biophys. J.* **116**, 975–982 (2019).

60. L. M. Guzman, D. Belin, M. J. Carson, J. Beckwith, Tight regulation, modulation, and high-level expression by vectors containing the arabinose PBAD promoter. *J. Bacteriol.* **177**, 4121–4130 (1995).
